# Supplementary material
Source: PubMed Central journal article supplement (PMC5547586)
Supplement: pnas.1618858114.sapp.pdf [file pnas.1618858114.sapp.pdf]

## 1 **Supporting Information**

### 2 **Text S1. Elaboration of systematic review process**

3 Data were collated from published experimental and comparative studies of the effects of bottom  
4 trawling on seabed habitat and biota following a systematic review protocol (1).

5  
6 ‘Bottom trawling’ is defined here to include any commercial towed bottom gear, including otter  
7 trawls, beam trawls, scallop dredges and hydraulic dredges used to catch fish and invertebrates  
8 living in, on or in close association with seabed habitats. For the systematic review we attempted to  
9 find every study in journal papers, book chapters and grey literature reports that reported the effect  
10 of bottom trawling on the state of seabed (benthic) taxa (species or higher taxonomic levels) and  
11 communities (biomass, abundance, taxon richness and diversity). Each identified study had to pass  
12 quality assurance criteria before associated data were included in our analysis (1). This approach  
13 eliminated the possibility of bias in selection of the studies. We included studies that reported the  
14 effect of bottom fishing activities (exposure) on marine benthic biota (subject) and compared this  
15 with effects of no exposure or less exposure to bottom fishing gear (comparator). Studies also had to  
16 report a measurable effect (or outcome, non–significant results were included) on at least one  
17 identified component of the benthic biota (and to report outcomes from two or more areas of the  
18 seabed subject to different intensities of fishing disturbance. Data on the state of benthic biota were  
19 extracted from figures, tables or text within publications. We only used studies reporting whole  
20 community biomass and/or abundance of macrofaunal invertebrates (infauna and/or epifauna). This  
21 includes all species that were effectively sampled, including scavenging species. If essential data  
22 were missing, incomplete or contained obvious errors, the lead author was contacted to request  
23 these data and these data were included in the analysis if received. 42% of contacted authors  
24 responded and provided the requested data, 13% responded but could not supply the requested  
25 data, and 44% of authors did not respond. Meta–data were also extracted for each study (including  
26 location, depth, gear type, habitat, Table S2 & S3).

27  
28 Most existing knowledge about fishing impacts has been gained from experimental studies, where  
29 abundance of benthic biota is recorded before and after experimental trawling. These studies were  
30 used to quantify the direct depletion  $d$  (or mortality) caused by the pass of a trawl (SI Text S2 for  
31 details on the analysis of this data). Comparative (or ‘gradient’ or ‘observational’) studies are studies  
32 where the benthic community is compared over a gradient of two or more levels of quantified  
33 fishing effort, where trawling effort may have been continuous, seasonal or a single event (SI Text S3

34 for details on the analysis of these data). The comparative studies allow the estimation of the ratio  
35 of  $d$  to  $r$ , and estimation of  $r$  when  $d$  is known from the experimental studies.

36

37 Gear types in the studies were classified as otter trawls (OT), beam trawls (BT), towed dredges (TD)  
38 and hydraulic dredges (HD). Otter trawls are widely used in all types of fisheries on a wide range of  
39 sediments and target species like gadoids, some flatfishes and prawns. The use of beam trawls is  
40 more restricted to sandy and gravelly bottoms and these gears are mostly used to target flatfishes  
41 and shrimps. Towed dredges are generally used to target scallops or other bivalve molluscs, and are  
42 often fished on gravelly bottoms. Hydraulic dredges are used to target buried bivalves and  
43 resuspend sediment to a depth of up to 40 cm. They are often used in intertidal and other shallow  
44 areas (2, 3).

45 **Text S2. Estimating depletion from experimental studies and penetration depth**

46 Depletion  $d$  for macrofauna community biomass and abundance was estimated from the  
 47 experimental studies identified in the systematic review. Studies used before–after (BA), control–  
 48 impact (CI), or before–after–control–impact (BACI) designs. 13 of the studies were carried out in  
 49 areas that were trawled in the last two years but generally at low intensity, 9 were carried out in  
 50 areas that were last trawled between 10 and 25 years ago, and 10 were carried out in areas that  
 51 have no fishing history. For the remaining studies this information was not given. Most experiments  
 52 have therefore been conducted in infrequently trawled and untrawled areas, this is possible because  
 53 even in the most heavily trawled areas like Europe about one-third of the seabed is not trawled (3).  
 54 We used the log response ratio ( $InRR$ ) as the response variable, which was calculated as  $\ln(\text{response}$   
 55  $\text{fished} / \text{response control})$  for CI studies and  $\ln(\text{response after} / \text{response before})$  for BA studies. The  
 56 combined variance was calculated as in Borenstein et al. (4). For BACI studies, calculation of the  $InRR$   
 57 and combined variance was more complicated. Let  $y = \log X$  denote the log abundance and  
 58 consider the four combinations of control/impact and before/after:  $y_{CB}$ ,  $y_{CA}$ ,  $y_{IB}$ , and  $y_{IA}$ . We  
 59 assumed that effects are multiplicative on the abundance scale, and therefore are additive on the  
 60 log scale. Let  $a$  be the before–after (period) effect,  $b$  the treatment effect, and  $c$  the interaction  
 61 term. Then  $y_{CB} = \mu$ ,  $y_{CA} = \mu + a$ ,  $y_{IB} = \mu + b$  and  $y_{IA} = \mu + a + b + c$ .

62 This means that  $c = y_{IA} - y_{IB} - y_{CA} + y_{CB}$ . On the abundance scale this implies

63 
$$c = \log \left[ \frac{X_{IA} / X_{CA}}{X_{IB} / X_{CB}} \right] \quad (\text{eq S2.1})$$

64 The quantity  $c$  is the analogue of  $InRR$  for BACI data. The variance calculation uses the following  
 65 approximation:

66 
$$\text{Var}[\log X] \simeq \frac{\text{Var}[X]}{[EX]^2} \quad (\text{eq S2.2})$$

67 This leads to this expression for the variance

68 
$$\text{Var}[c] \simeq \frac{SD_{IA}^2}{n_{IA}\bar{X}_{IA}^2} + \frac{SD_{IB}^2}{n_{IB}\bar{X}_{IB}^2} + \frac{SD_{CA}^2}{n_{CA}\bar{X}_{CA}^2} + \frac{SD_{CB}^2}{n_{CB}\bar{X}_{CB}^2} \quad (\text{eq S2.3})$$

69  
 70 The  $InRR$  will be more negative in areas that have been exposed to a higher frequency of fishing  
 71 disturbance. Therefore, it was corrected using  $InRR = InRR_{\text{uncorrected}} / Idis$  where  $Idis$  is the number of  
 72 trawl passes over the fished area.

73 The number of data points available for estimating  $d$  was limited: 55 for community biomass and 101  
 74 for community abundance (OT: 25, BT: 6, TD: 87, HD: 38). Including the response unit (biomass or

75 abundance) as a factor in the model did not result in a lower AIC, therefore we estimated  $d$  using  
76 both biomass and abundance values in a single model.

77

## 78 **Penetration depth of different gear types**

79 Predicted penetration depth ( $P$ ) of each trawl type was estimated from the penetration depth of the  
80 individual components of the gear weighted by the width of these components. Penetration depth is  
81 defined as the depth to which the sediment was disturbed by the fishing gear, but in practice often  
82 measured as the depth to which the sediment was excavated. We conducted a systematic search of  
83 the literature starting from Table 6 in Eigaard et al. (5). Each reference in the table was checked and  
84 only included when a study directly measured penetration depth. A database of experimental and  
85 comparative studies of fishing impacts, produced during a systematic review (1) was also screened  
86 for further studies that provided measurements of penetration depth. In addition, references cited  
87 within each reference already identified were screened and further studies included as a result. Any  
88 study for which penetration depth of a fishing gear (whole), or a gear component, was measured or  
89 inferred by one of the following methods was included: underwater video, underwater photographs  
90 side-scan sonar, sediment profile images, markers in sediment, observations by SCUBA divers, high  
91 resolution acoustic array, underwater laser, inferred from the living position of benthic organisms  
92 retained by the fishing gear, or in the case of intertidal fishing methods – by direct observation.  
93 Because different methods were used, estimates of penetration depths across studies may not be  
94 directly comparable, although they are the best available estimates. Review papers that were not  
95 the primary source of penetration depth data were not included, but were used to identify primary  
96 sources of data. Studies that reported penetration depths but that were not included in our analysis  
97 are given in Table S8.

98

99 The sources we identified reported the penetration depth either for the whole gear or for individual  
100 gear components (e.g., doors, sweeps, and bridles of an OT). The predicted penetration depth per  
101 gear component was therefore estimated by fitting a nested linear model where  $\log(\text{penetration}+1)$   
102  $\sim$  sediment type + Gear|Component. Although we were not directly interested in the effect of  
103 sediment type, it was included because within gears the penetration seemed to vary with sediment  
104 type and it allowed us to correct for this effect in the final  $P$  estimates (Gear:Component  $F_{9,74}=6.57$ ,  $p$   
105  $<0.001$ , Habitat  $F_{3,71}=2.6$ ,  $p=0.057$ ). We used the fitted model to predict the penetration depth for  
106 each gear component in each sediment type, and estimated the overall  $P$  for each fishing gear from

107 this in two steps. We first averaged predicted penetration depths over all sediment types for each  
108 gear component, and then estimated the mean  $P$  for each gear by taking the mean weighted by the  
109 width of these components.

110 **Text S3. Estimating the effect of trawling in comparative studies**

111 As described in the main text, the responses from different studies were normalised to the common  
112 units of  $B/K$ .  $K$  was estimated for each of the sampling methods as  $10^{\text{intercept}}$  of the relationship  
113 of  $\log_{10} B$  versus  $F$ . In some studies the biota was sampled using two or more methods, each suited  
114 to sampling a different component of the community. For example, Hiddink et al. (6) sampled each  
115 station across a gradient of trawling frequency with an anchor dredge, box corer and 2m beam  
116 trawl. Where two or more sampling methods were used to sample benthic community biomass,  $K$   
117 was estimated separately for each sampling gear. Studies were treated as replicate measurements  
118 by using study as a random effect.

119

120 A collective analysis of gradient studies requires fishing pressure to be described on a common scale.  
121 We adopted trawling frequency,  $F$  ( $\text{y}^{-1}$ ), which is equivalent to the swept area ratio ( $\text{km}^2 \text{ km}^{-2} \text{ y}^{-1}$ ).  
122 Trawling frequency expresses how often each cell is trawled in a year, and is calculated by dividing  
123 the area trawled in a year by the area of the study site or other defined area (e.g. grid cell). Trawled  
124 area is usually calculated using logbook or vessel monitoring system (VMS) data, from the number of  
125 hours spent fishing multiplied by the fishing speed and the width of the fishing gear. Trawling  
126 frequency was explicitly reported for about half the comparative studies, and for the other half we  
127 calculated trawling frequency from the reported fishing effort (Table S9). Where trawling frequency  
128 could not be calculated, the study was excluded from further analyses.

129 Here we apply eq. 3.1 for estimating the effect of trawling on  $B/K$  for groups of species and  
130 communities. These communities, however, comprise many species with wide variety of  $r$  and  $K$   
131 values. Therefore, the response to fishing is the sum of the responses of all those species. Because  
132 low- $r$  species will be more depleted than high- $r$  species, and will potentially be extirpated from the  
133 community, the response of the community to  $F$  is not a straight line as in eq. 3.1. Consequently, the  
134 average  $r$  of the community increases with  $F$ , and the marginal effect of each additional unit of  $F$  on  
135 community  $B/K$  decreases with increasing  $F$ . We simulated a community of species by drawing  $r$  and  
136  $K$  values at random, and found that the resulting relationship between total community  $B$  and  $F$  is  
137 well approximated by a log-linear relationship for normal and exponential distributions of  $r$  and  $K$ .  
138 We therefore estimated the effect of trawling on communities by fitting a model based on the  
139 approximation:

140

141  $\log_{10}(B/K) \sim bF$  (eq. S3.1)

142

143 where  $b$  is the slope of the relationship. After fitting a linear relationship to  $\log_{10} B$  versus  $F$  for each  
144 comparative study,  $K$  was estimated as the  $10^{\text{intercept}}$  of this relationship.

145 **Text S4. Estimating  $r$  from  $d$  and  $b$  and quantifying uncertainty**

146

147 Comparative studies involve sampling the seabed biota at locations within sites subject to different  
148 frequencies of trawling disturbance. Collectively, the sampling locations only cover a small  
149 proportion of each site, but the mean trawling frequency estimated for the site is assumed to apply  
150 to all stations within the site because data on trawl positions are not sufficiently resolved to  
151 estimate location-specific trawling frequency. Thus samples linked to the same mean trawling  
152 frequency for the site may come from heavily trawled patches, lightly trawled patches, and  
153 potentially some untrawled patches, within the site. Consequently, the mean recovery rate  
154 estimated for the site ( $R$ ) will not be the same as the intrinsic rate of recovery  $r$  in equation (1). If the  
155 distribution which describes the patchiness of trawling within a site is known then  $r$  can be  
156 estimated following the approach in Ellis et al. (7). Given that  $\log_{10}(B/K) \sim bF$  (SI Text S3) and that  $B/K$   
157  $= 1 - (d/R) F$ , it follows that  $10^{bF} = 1 - (d/R) F$ . The equation to estimate  $R$  from  $r$  for a single species in  
158 Ellis et al. (7,  $R = r \log(1+\beta d)/[-\beta \log(1-d)]$ ) can therefore be rewritten to estimate  $r$  for the  
159 community as:

160 
$$r = R / \frac{\log(1+\beta d)}{-\beta \log(1-d)} \quad (\text{eq S4.1})$$

161 where

162 
$$R = \frac{-d}{(10^{bF}-1)/F} \quad (\text{eq S4.2})$$

163

164 where  $\beta$  is a parameter defining the spatial distribution of trawling within a site (7). Here we  
165 assumed  $\beta \approx 0$ , representing a random distribution of trawling within a site (in practice  $\beta = 10^{-6}$   
166 because the equation is undefined when  $\beta = 0$ ). A random distribution within sites is supported by  
167 data on the spatial distribution of trawling collected at scales of around 1 km and smaller (8),  
168 consistent with the scales at which sites in comparative trawling studies are defined. Assuming a  
169 uniform distribution of trawling ( $\beta = -1$ ) resulted in  $r$  estimates that were approximately 10% lower.  
170 Equation S4.1 and S4.2 indicate that  $r$  depends on  $F$ , which is expected because changes in  
171 community composition to favour biota with faster life histories. Because we aim to estimate  
172 recovery rates and times for the original unfished community, we used estimates of  $r$  at  $F = 0$  to  
173 estimate recovery times. If the distribution of trawling in a cell is random, the site level depletion is  
174 the same as local depletion  $d$  and no correction was therefore applied here.

175



176 To propagate the uncertainty in the estimates of  $b$  and  $d$  into the estimate of  $r$  we sampled the  
177 distributions of  $b$  and  $d$  estimates to derive the distribution of  $r$ . The value of  $b$  was taken as negative  
178 and  $-b$  was assumed to have a log-normal distribution, with the standard deviation estimated from  
179 the distribution of the random slopes using the *fitdist* function in the *fitdistrplus* package in R (9).  
180 The value of  $d$  was assumed to be positive and bounded between 0 and 1, and to have a logitnormal  
181 distribution with standard deviation estimated with the function *twCoefLogitnorm* of the *logitnorm*  
182 package in R (10). We sampled 2000 combinations from the distributions of  $b$  and  $d$  to estimate the  
183 distribution of  $r$ .

184 **Text S5. Estimating recovery time from  $r$**

185

186 The logistic  $r$  can be used to estimate recovery time (i.e.  $T$  from a defined level of depletion below  $K$   
187 to a defined proportion of  $K$ ). Lambert et al. (11) derived the recovery time  $T$  to  $0.9K$  as:

188

189 
$$T = \frac{1}{r} \left[ \ln \left( \frac{0.9K}{B_{t=0}} \right) + \ln \left( \frac{K - B_{t=0}}{0.1K} \right) \right] \quad (\text{eq. S5.1})$$

190

191 If we generalise this in terms of any fraction of  $K$  at which recovery is deemed to have occurred ( $\phi$ )  
192 and assume that  $B_{t=0}$  is the biomass or abundance of an unimpacted habitat remaining after the pass  
193 of a gear that reduces biomass or abundance by a fraction  $d$ , then the recovery time given these  
194 conditions would be:

195

196

197 
$$T = \frac{1}{r} \left[ \ln \left( \frac{\phi K}{K(1-d)} \right) + \ln \left( \frac{K - K(1-d)}{K(1-\phi)} \right) \right] \quad (\text{eq. S5.2})$$

198

199

200 which can be expressed more simply as:

201

202 
$$T = \frac{1}{r} \ln \left( \frac{\phi d}{(1-d)(1-\phi)} \right) \quad (\text{eq. S5.3})$$

203

204 Table S1. Number of studies of whole community biomass and abundance for macrofauna per gear  
205 and habitat. Otter trawls (OT), beam trawls (BT), towed dredges (TD), hydraulic dredges (HD).

206 a) Experimental studies

|                      | OT | BT | TD | HD |
|----------------------|----|----|----|----|
| Biogenic             | –  | –  | –  | –  |
| Gravel               | 1  | –  | 1  | –  |
| Sand                 | 6  | 4  | 16 | 10 |
| Sandy mud/Muddy sand | –  | –  | –  | 2  |
| Mud                  | 5  | –  | –  | 1  |

207

208 b) Comparative studies

|                      | OT | BT | TD | HD |
|----------------------|----|----|----|----|
| Biogenic             | –  | –  | –  | –  |
| Gravel               | 1  | –  | 5  | –  |
| Sand                 | 3  | 4  | –  | –  |
| Sandy mud/Muddy sand | 5  | 2  | –  | –  |
| Mud                  | 4  | –  | –  | –  |

209

210

211 Table S2. Metadata for included experimental studies. A single paper is listed more than once when  
 212 two or more studies were reported in the same paper.

| Source | Region          | Habitat | Depth (m) | Gear |
|--------|-----------------|---------|-----------|------|
| (12)   | Southern Europe | S       | 8         | TD   |
| (12)   | Southern Europe | S       | 8         | TD   |
| (13)   | Alaska          | S       | 25        | OT   |
| (14)   | Southern Europe | S       | 9         | TD   |
| (14)   | Southern Europe | S       | 9         | TD   |
| (15)   | Southern Europe | S       | 6         | TD   |
| (15)   | Southern Europe | S       | 18        | TD   |
| (16)   | Australia       | S       | 20        | OT   |
| (16)   | Australia       | M       | 18        | OT   |
| (16)   | Australia       | S       | 20        | OT   |
| (17)   | Northern Europe | S       | 10        | TD   |
| (17)   | Northern Europe | S       | 10        | TD   |
| (17)   | Northern Europe | S       | 10        | TD   |
| (17)   | Northern Europe | S       | 10        | TD   |
| (18)   | North America   | mS      | 65        | HD   |
| (19)   | North America   | S       | 5.5       | HD   |
| (20)   | Northern Europe | mS      | 0         | HD   |
| (21)   | Northern Europe | S       | 7         | HD   |
| (22)   | North America   | G       | 70        | OT   |
| (23)   | Northern Europe | S       | 21.5      | TD   |
| (23)   | Northern Europe | S       | 21.5      | OT   |
| (23)   | Northern Europe | S       | 21.5      | TD   |
| (24)   | Northern Europe | S       | 26        | BT   |
| (24)   | Northern Europe | S       | 34        | BT   |
| (25)   | Northern Europe | S       | 0         | HD   |
| (26)   | Northern Europe | S       | 30        | BT   |
| (26)   | Northern Europe | S       | 30        | BT   |
| (27)   | North America   | S       | 0.2       | HD   |
| (27)   | North America   | S       | 0.2       | HD   |
| (27)   | North America   | S       | 0.2       | HD   |
| (28)   | Southern Europe | S       | 24        | TD   |

|      |                 |   |      |    |
|------|-----------------|---|------|----|
| (29) | Southern Europe | S | 23   | TD |
| (29) | Southern Europe | M | 11   | TD |
| (30) | South America   | S | 10   | OT |
| (31) | Canada          | S | 133  | OT |
| (32) | Southern Europe | M | 30   | OT |
| (32) | Southern Europe | M | 40   | OT |
| (33) | Australia       | S | 0    | HD |
| (34) | North America   | M | 61   | OT |
| (35) | Northern Europe | M | 0    | HD |
| (36) | New Zealand     | S | 24   | TD |
| (37) | New Zealand     | S | 24   | TD |
| (38) | Northern Europe | M | 33.5 | OT |
| (39) | Northern Europe | S | 3.5  | HD |
| (40) | South Africa    | S | 0    | HD |
| (40) | South Africa    | S | 0    | HD |

---

213

214

215 Table S3. Metadata for included comparative studies. sM & mS – sandy mud and muddy sand.

| Source    | Region                | Habitat | Depth (m) | Gear |
|-----------|-----------------------|---------|-----------|------|
| (41)      | South Africa          | sM & mS | 420       | OT   |
| (42)      | Eastern North America | Gravel  | 48        | TD   |
| (43)      | South Coast Australia | Sand    | 30        | OT   |
| (44)      | North Sea             | Mud     | 80        | OT   |
| (6)       | North Sea             | Sand    | 32.5      | BT   |
| (6)       | North Sea             | Sand    | 40        | BT   |
| (45)      | Northwest Europe      | sM & mS | 31.5      | OT   |
| (46)      | North west Europe     | sM & mS | 31.5      | OT   |
| (47)      | Central North Sea,    | sM & mS | 57.5      | BT   |
| (47)      | Central North Sea,    | Sand    | 57.5      | BT   |
| (48)      | North Sea             | sM & mS | 50        | BT   |
| (49)      | Irish Sea             | Gravel  | 43.5      | TD   |
| (50)      | Mediterranean Sea     | Mud     | 137.145   | OT   |
| (51, 52)* | Australia             | sM & mS | 27.5      | OT   |
| (51, 52)* | Australia             | Sand    | 25.5      | OT   |
| (53)      | Irish Sea             | sM & mS | 30        | OT   |
| (54)      | North West Europe     | Sand    | 40        | BT   |
| (55)      | Eastern North America | Gravel  | 74        | TD   |
| (55)      | Eastern North America | Gravel  | 50        | TD   |
| (56)      | Australia             | Sand    | 23.5      | OT   |
| (57)      | North west Europe     | Mud     | 147.5     | OT   |
| (57)      | North west Europe     | Gravel  | 78.5      | OT   |
| (58)      | Irish Sea             | Gravel  | 43.5      | TD   |
| (59)      | North west Europe     | Mud     | 100       | OT   |

216 \* sources combined

217

218 Table S4. Penetration depth  $P$  and depletion  $d$  of community biomass and abundance for different  
 219 trawling gears. The 5 and 95% percentiles for  $d$  estimates are given. Gear types are otter trawls (OT),  
 220 beam trawls (BT), towed dredges (TD) and hydraulic dredges (HD).

| Gear | Penetration depth (cm) |   |      | Depletion $d$ (fraction) |        |      |
|------|------------------------|---|------|--------------------------|--------|------|
|      | mean                   | ± | sd   | 5%                       | Median | 95%  |
| OT   | 2.44                   | ± | 1.14 | 0.02                     | 0.06   | 0.16 |
| BT   | 2.72                   | ± | 1.24 | 0.07                     | 0.14   | 0.25 |
| TD   | 5.47                   | ± | 2.19 | 0.13                     | 0.20   | 0.30 |
| HD   | 16.11                  | ± | 5.80 | 0.35                     | 0.41   | 0.48 |

221

222

223

224 Table S5. AIC estimates of the linear mixed models with different explanatory variables for  
 225 community biomass and abundance in comparative studies. The model with the lowest AIC for  
 226 biomass and the two models with the lowest AIC for abundance are given in bold.

| Model             | Biomass      | Abundance   |
|-------------------|--------------|-------------|
| None              | <b>566.9</b> | 89.5        |
| Habitat           | 573.1        | 94.3        |
| Gear              | 572.5        | 92.4        |
| <i>d</i>          | 568.9        | 89.5        |
| Penetration       | 568.8        | 89.3        |
| SBT               | 568.8        | 89.1        |
| Depth             | 567.7        | 91.4        |
| POC               | 567.7        | 91.1        |
| PP                | 568.0        | 90.9        |
| Gravel            | 568.4        | <b>81.1</b> |
| Sand              | 568.8        | 89.2        |
| Mud               | 568.9        | 90.2        |
| <i>d</i> /SBT     | 568.9        | 89.5        |
| <i>d</i> *Depth   | 567.9        | 90.8        |
| <i>d</i> /POC     | 568.7        | 91.1        |
| <i>d</i> /PP      | 568.8        | <b>86.1</b> |
| Penetration/SBT   | 568.9        | 90.0        |
| Penetration×Depth | 567.8        | 91.4        |
| Penetration/POC   | 568.5        | 91.4        |
| Penetration/PP    | 568.7        | 89.0        |

227



- 228  $d$  = depletion estimate from experimental studies (fraction per trawl pass)
- 229 Penetration = penetration depth of fishing gear into the seabed (cm)
- 230 SBT = sea bottom temperature ( $^{\circ}\text{C}$ )
- 231 POC = Particulate organic carbon flux to the seabed ( $\text{g C}_{\text{org}} \text{m}^{-2} \text{yr}^{-1}$ )
- 232 PP = Primary production ( $\text{mg C m}^{-2} \text{d}^{-1}$ )
- 233 Gravel, Sand & Mud = sediment composition in % by weight
- 234 Habitat = categorical variable with levels Mud, sM & mS, Sand and Gravel.
- 235
- 236

237 Table S6. Parameters used to estimate  $r$  and percentiles from the distribution of  $r$  estimates. SD =  
 238 standard deviation. SAR= swept area ratio.

|                                                                | <b>Biomass</b> |        | <b>Abundance</b> |        |
|----------------------------------------------------------------|----------------|--------|------------------|--------|
|                                                                | Combined       | OT     | BT               | TD     |
| Gear type                                                      |                |        |                  |        |
| Gravel content (%)                                             | NA             | 0.84   | 0.00             | 44.63  |
| $d$ (fraction)                                                 | 0.13           | 0.06   | 0.14             | 0.20   |
| SD of $d$                                                      | 0.08           | 0.08   | 0.08             | 0.08   |
| $b$ (slope)                                                    | -0.075         | -0.025 | -0.015           | -0.553 |
| SD of $b$                                                      | 0.003          | 0.057  | 0.057            | 0.057  |
| % decline with unit increase in SAR                            | 15.90          | 5.50   | 3.29             | 71.99  |
| Recovery time from 0.5K to 0.95K<br>(years, using median $r$ ) | 3.58           | 2.81   | 0.66             | 16.65  |
| $r$ , 5% percentile                                            | 0.42           | 0.33   | 2.37             | 0.11   |
| $r$ , 10% percentile                                           | 0.49           | 0.43   | 2.75             | 0.12   |
| $r$ , 25% percentile                                           | 0.63           | 0.66   | 3.50             | 0.15   |
| $r$ , 50% percentile                                           | 0.82           | 1.05   | 4.49             | 0.18   |
| $r$ , 75% percentile                                           | 1.06           | 1.66   | 5.71             | 0.21   |
| $r$ , 90% percentile                                           | 1.34           | 2.60   | 7.18             | 0.25   |
| $r$ , 95% percentile                                           | 1.54           | 3.54   | 8.21             | 0.28   |

239

240

241 Table S7. Studies used to estimate the penetration depth of different gear types. Weighting is the  
 242 fraction of the width of the gear occupied by a component.

| Source | Gear | Component                   | Habitat | Penetration<br>(cm) | Weighting |
|--------|------|-----------------------------|---------|---------------------|-----------|
| (60)   | BT   | Beam trawl - whole gear     | Sand    | 6                   | 1         |
| (61)   | BT   | Beam trawl - whole gear     | Sand    | 2.26                | 1         |
| (61)   | BT   | Beam trawl - whole gear     | Mud     | 5.29                | 1         |
| (62)   | BT   | Beam trawl - whole gear     | Sand    | 1                   | 1         |
| (63)   | BT   | Beam trawl - tickler chains | Mud     | 1.4                 | 0.94      |
| (64)   | BT   | Beam trawl - tickler chains | Sand    | 0.75                | 0.94      |
| (65)   | BT   | Beam trawl - tickler chains | Sand    | 6                   | 0.94      |
| (63)   | BT   | Beam trawl - tickler chains | Sand    | 0.4                 | 0.94      |
| (63)   | BT   | Beam trawl - tickler chains | Gravel  | 0.5                 | 0.94      |
| (64)   | BT   | Beam trawl - tickler chains | Mud     | 0.9                 | 0.94      |
| (61)   | BT   | Beam trawl - tickler chains | Sand    | 1                   | 0.94      |
| (64)   | BT   | Beam trawl - tickler chains | Sand    | 0                   | 0.94      |
| (61)   | BT   | Beam trawl - trawl shoes    | Sand    | 1.9                 | 0.06      |
| (64)   | BT   | Beam trawl - trawl shoes    | Sand    | 1.5                 | 0.06      |
| (66)   | OT   | Otter trawl - whole gear    | Mud     | 8.5                 | 1         |
| (67)   | OT   | Otter trawl - whole gear    | Sand    | 4.5                 | 1         |
| (66)   | OT   | Otter trawl - whole gear    | Sand    | 0.085               | 1         |
| (68)   | OT   | Otter trawl - whole gear    | Gravel  | 4.5                 | 1         |
| (69)   | OT   | Otter trawl - sweeps        | Mud     | 2.18                | 0.73      |
| (69)   | OT   | Otter trawl - ground gear   | Mud     | 1.4                 | 0.25      |
| (70)   | OT   | Otter trawl - ground gear   | Mud     | 0                   | 0.25      |
| (71)   | OT   | Otter trawl - trawl doors   | Mud     | 30                  | 0.02      |
| (72)   | OT   | Otter trawl - trawl doors   | Mud     | 12.5                | 0.02      |
| (73)   | OT   | Otter trawl - trawl doors   | Mud     | 5.5                 | 0.02      |
| (73)   | OT   | Otter trawl - trawl doors   | Sand    | 2.7                 | 0.02      |
| (69)   | OT   | Otter trawl - trawl doors   | Mud     | 6.43                | 0.02      |
| (71)   | OT   | Otter trawl - trawl doors   | Sand    | 20                  | 0.02      |
| (72)   | OT   | Otter trawl - trawl doors   | Sand    | 2.5                 | 0.02      |
| (74)   | OT   | Otter trawl - trawl doors   | Sand    | 10                  | 0.02      |
| (75)   | OT   | Otter trawl - trawl doors   | Mud     | 5                   | 0.02      |
| (75)   | OT   | Otter trawl - trawl doors   | Sand    | 2.5                 | 0.02      |
| (69)   | OT   | Otter trawl - trawl doors   | Sand    | 0.26                | 0.02      |
| (69)   | OT   | Otter trawl - trawl doors   | Sand    | 2.1                 | 0.02      |

|      |    |                                 |        |       |      |
|------|----|---------------------------------|--------|-------|------|
| (69) | OT | Otter trawl - trawl doors       | Sand   | 5.8   | 0.02 |
| (69) | OT | Otter trawl - trawl doors       | Sand   | 0.2   | 0.02 |
| (76) | OT | Otter trawl - trawl doors       | Gravel | 5.5   | 0.02 |
| (77) | OT | Otter trawl - trawl doors       | Sand   | 15    | 0.02 |
| (62) | OT | Otter trawl - trawl doors       | Mud    | 14    | 0.02 |
| (70) | OT | Otter trawl - trawl doors       | Mud    | 4.5   | 0.02 |
| (75) | OT | Twin Otter trawl - roller clump | Sand   | 0     | 0.01 |
| (75) | OT | Twin Otter trawl - roller clump | Mud    | 0     | 0.01 |
| (72) | OT | Twin Otter trawl - roller clump | Mud    | 3.5   | 0.01 |
| (73) | OT | Twin Otter trawl - roller clump | Mud    | 12.5  | 0.01 |
| (76) | OT | Twin Otter trawl - roller clump | Mud    | 12    | 0.01 |
| (73) | OT | Twin Otter trawl - roller clump | Sand   | 3.65  | 0.01 |
| (66) | OT | Otter trawl - whole gear        | Mud    | 8.5   | 1    |
| (67) | OT | Otter trawl - whole gear        | Sand   | 4.5   | 1    |
| (66) | OT | Otter trawl - whole gear        | Sand   | 0.085 | 1    |
| (68) | OT | Otter trawl - whole gear        | Gravel | 4.5   | 1    |
| (69) | OT | Otter trawl - sweeps            | Mud    | 2.18  | 0.73 |
| (69) | OT | Otter trawl - ground gear       | Mud    | 1.4   | 0.25 |
| (70) | OT | Otter trawl - ground gear       | Mud    | 0     | 0.25 |
| (71) | OT | Otter trawl - trawl doors       | Mud    | 30    | 0.01 |
| (72) | OT | Otter trawl - trawl doors       | Mud    | 12.5  | 0.01 |
| (73) | OT | Otter trawl - trawl doors       | Mud    | 5.5   | 0.01 |
| (73) | OT | Otter trawl - trawl doors       | Sand   | 2.7   | 0.01 |
| (69) | OT | Otter trawl - trawl doors       | Mud    | 6.43  | 0.01 |
| (71) | OT | Otter trawl - trawl doors       | Sand   | 20    | 0.01 |
| (72) | OT | Otter trawl - trawl doors       | Sand   | 2.5   | 0.01 |
| (74) | OT | Otter trawl - trawl doors       | Sand   | 10    | 0.01 |
| (75) | OT | Otter trawl - trawl doors       | Mud    | 5     | 0.01 |
| (75) | OT | Otter trawl - trawl doors       | Sand   | 2.5   | 0.01 |
| (69) | OT | Otter trawl - trawl doors       | Sand   | 0.26  | 0.01 |
| (69) | OT | Otter trawl - trawl doors       | Sand   | 2.1   | 0.01 |
| (69) | OT | Otter trawl - trawl doors       | Sand   | 5.8   | 0.01 |
| (69) | OT | Otter trawl - trawl doors       | Sand   | 0.2   | 0.01 |
| (76) | OT | Otter trawl - trawl doors       | Gravel | 5.5   | 0.01 |
| (77) | OT | Otter trawl - trawl doors       | Sand   | 15    | 0.01 |
| (62) | OT | Otter trawl - trawl doors       | Mud    | 14    | 0.01 |
| (70) | OT | Otter trawl - trawl doors       | Mud    | 4.5   | 0.01 |
| (35) | HD | Hydraulic dredge                | Mud    | 10    | 1    |

|      |    |                          |        |     |   |
|------|----|--------------------------|--------|-----|---|
| (18) | HD | Hydraulic dredge         | Sand   | 20  | 1 |
| (19) | HD | Hydraulic dredge         | Sand   | 5   | 1 |
| (20) | HD | Hydraulic dredge         | Mud    | 30  | 1 |
| (21) | HD | Hydraulic dredge         | Sand   | 25  | 1 |
| (25) | HD | Hydraulic dredge         | Mud    | 10  | 1 |
| (78) | HD | Hydraulic dredge         | Sand   | 9   | 1 |
| (79) | HD | Hydraulic dredge         | Sand   | 40  | 1 |
| (20) | HD | Tractor dredge           | Mud    | 30  | 1 |
| (80) | HD | Hydraulic dredge         | Sand   | 5   | 1 |
| (28) | TD | Boat Dredge - whole gear | Sand   | 6   | 1 |
| (17) | TD | Boat Dredge - teeth      | Sand   | 3.5 | 1 |
| (81) | TD | Boat Dredge - teeth      | Maerl  | 10  | 1 |
| (82) | TD | Boat Dredge - whole gear | Sand   | 2.5 | 1 |
| (82) | TD | Boat Dredge - whole gear | Gravel | 3.5 | 1 |
| (82) | TD | Boat Dredge - whole gear | Gravel | 5.9 | 1 |

---

243

244

245 Table S8. A list of studies which relate to the physical impacts of towed-bottom fishing gears, but  
246 were not included in the penetration depth calculations for the reasons given.

247

| Source   | Reason for non-inclusion                                                                                                        |
|----------|---------------------------------------------------------------------------------------------------------------------------------|
| (83)     | Not the primary source of the reported gear penetration depth                                                                   |
| (84)     | Penetration depth not reported                                                                                                  |
| (85)     | Penetration depth not reported                                                                                                  |
| (86)     | Penetration depth not reported                                                                                                  |
| (87)     | Review paper, therefore not a primary data source                                                                               |
| (88)     | Penetration depths obtained from a numerical model, rather than direct measurements                                             |
| (89)     | Penetration depth not reported                                                                                                  |
| (90)     | Not the primary source of the reported gear penetration depth                                                                   |
| (91)     | Not the primary source of the reported gear penetration depth                                                                   |
| (92)     | Unable to obtain manuscript, however a penetration depth of c. 6.5cm is cited in de Groot (1995) and referenced to this report. |
| (93)     | Not the primary source of the reported gear penetration depth                                                                   |
| (94)     | The source of the seabed marks measured in the study is ambiguous                                                               |
| (95, 96) | Penetration depth inferred from amount of suspended sediment only, missing non-suspended component of penetration.              |

248

249

Table S9. Trawling frequency calculations for comparative studies where trawling frequency was not reported as the swept area ratio (SAR).

| Paper                 | Region                                | Habitat | Depth (m) | Gear                  | Gear | Source of swept area ratio estimate (SA) | Reported effort                  | Area box          | Fishing speed | Gear width (m) | SAR calculation (after converting to the same units) | Min SAR ( $y^{-1}$ ) | Max SAR ( $y^{-1}$ ) |
|-----------------------|---------------------------------------|---------|-----------|-----------------------|------|------------------------------------------|----------------------------------|-------------------|---------------|----------------|------------------------------------------------------|----------------------|----------------------|
| Abbreviation          |                                       |         |           |                       |      |                                          | <b>E</b>                         | <b>A</b>          | <b>Sp</b>     | <b>W</b>       |                                                      |                      |                      |
| Collie et al. 2005    | Georges Bank, North America           | Gravel  | 48        | Scallop dredge        | TD   | Calculate d                              | hrs fished $y^{-1}$              | 1 nm <sup>2</sup> | 3 kn          | 8              | E*Sp*W/A                                             | 0.0                  | 3.7                  |
| Currie et al. 2011    | Spencer Gulf, South Eastern Australia | Sand    | 30        | Prawn trawl           | OT   | Calculate d                              | h km <sup>-2</sup>               |                   | 3 kn          | 29.26          | E*Sp*W                                               | 0.1                  | 2.9                  |
| Frid et al. 1999      | Northumberland, NE England, USA       | Mud     | 80        | Otter trawls          | OT   | Calculate d                              | km <sup>2</sup> trawled $y^{-1}$ | ICES++            |               |                | E/A                                                  | 0.0                  | 12.9                 |
| Jennings et al. 2001a | Silver Pit, North Sea                 | Sm & Ms | 57.5      | Beam trawl            | BT   | Estimate d using VMS                     |                                  |                   |               |                |                                                      | 0.5                  | 5.4                  |
| Jennings et al. 2001b | Hills, North Sea                      | Sand    | 57.5      | Beam trawl            | BT   | Estimate d using VMS                     |                                  |                   |               |                |                                                      | 0.1                  | 2.3                  |
| Jennings et al. 2002  | Silver Pit, North Sea                 | Sm & Ms | 50        | Beam and otter trawls | BT   | Estimate d using VMS                     |                                  |                   |               |                |                                                      | 0.4                  | 5.0                  |
| Kaiser et al.         | Irish Sea, Isle of                    | Gravel  | 43.5      | Scallop               | TD   | Calculate                                | hrs fished                       | 5x5 nm            | 2.5 kn        | 12.0+          | E*Sp*W/A                                             | 0.1                  | 3.2                  |

|              |                    |        |      |          |    |           |                 |                          |        |       |          |     |     |  |
|--------------|--------------------|--------|------|----------|----|-----------|-----------------|--------------------------|--------|-------|----------|-----|-----|--|
| 2000b        | Man                |        |      | dredge   |    | d         | $y^{-1}$        |                          |        |       |          |     |     |  |
| Reiss et al. | German Bight,      | Sand   | 40   | Beam     | BT | Reported  |                 |                          |        |       |          | 0.1 | 2.0 |  |
| 2009         | Germany            |        |      | trawl    |    |           |                 |                          |        |       |          |     |     |  |
| Smith et al. | North East         | Gravel | 74   | Scallop  | TD | Calculate | hrs fished      | 50 km <sup>2</sup>       | 3 kn   | 30    | E*Sp*W/A | 0.0 | 0.4 |  |
| 2013a        | Peak, Georges      |        |      | dredge   |    | d         | $y^{-1}$        |                          |        |       |          |     |     |  |
|              | Bank, N.           |        |      |          |    |           |                 |                          |        |       |          |     |     |  |
|              | America            |        |      |          |    |           |                 |                          |        |       |          |     |     |  |
| Smith et al. | CAI, Georges       | Gravel | 50   | Scallop  | TD | Calculate | hrs fished      | 50 km <sup>2</sup>       | 3 kn   | 30    | E*Sp*W/A | 0.0 | 0.4 |  |
| 2013b        | Bank, N.           |        |      | dredge   |    | d         | $y^{-1}$        |                          |        |       |          |     |     |  |
|              | America            |        |      |          |    |           |                 |                          |        |       |          |     |     |  |
| Svane et al. | Spencer Gulf,      | Sand   | 23.5 | Prawn    | OT | Calculate | h trawled       | 645 to                   | 2.5 kn | 29.26 | E*Sp*W/A | 0.2 | 1.9 |  |
| 2009         | Australia          |        |      | trawl    |    | d         | per year        | 1128                     |        |       |          |     |     |  |
|              |                    |        |      |          |    |           |                 | km2                      |        |       |          |     |     |  |
| Veale et al. | Irish Sea, Isle of | Gravel | 43.5 | Scallop  | TD | Calculate | m x h $y^{-1}$  | 5x5 nm                   | 2.5 kn | 10    | E*Sp*W/A | 0.0 | 1.7 |  |
| 2000         | Man                |        |      | dredge   |    | d         |                 |                          |        |       |          |     |     |  |
| Vergnon &    | Grande Vasiere,    | Mud    | 100  | Nephrops | OT | Calculate | mths            | ICES                     | 2 kn   | 10    | E*Sp*W/A | 1.6 | 7.9 |  |
| Blanchard    | Bay of Biscay,     |        |      | trawl    |    | d         | fished $y^{-1}$ | rectangl                 |        |       |          |     |     |  |
| 2006         | France             |        |      |          |    |           |                 | e (1 *<br>0.5<br>degree) |        |       |          |     |     |  |

† 16 dredges (10 within 3nmi limit) of 0.75m width.

†† ICES rectangles of size 1° × 0.5°.



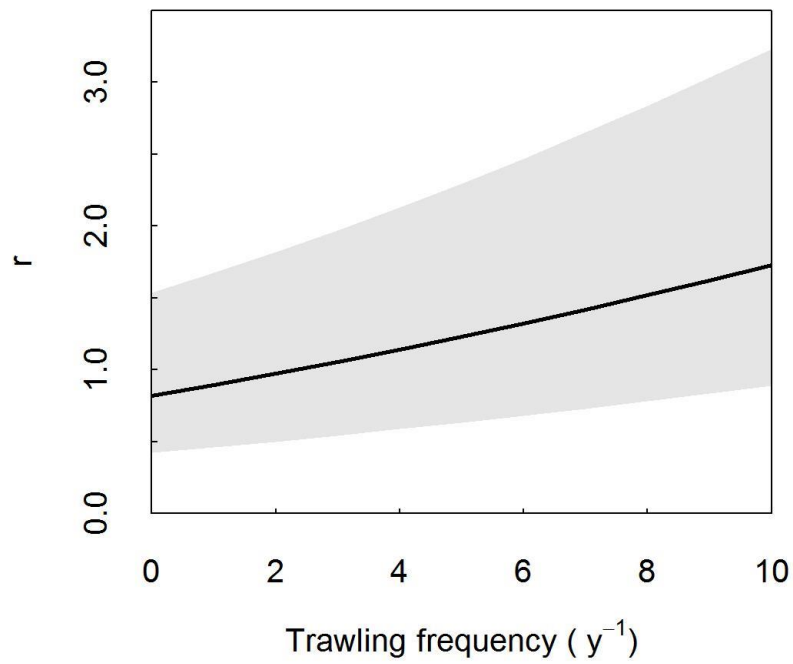

Figure S1. Predicted increase in median  $r$  ( $\pm 5$ -95% quantiles) with trawling frequency for community biomass, as estimated from the relationship between  $\log_{10}B/K$  and trawling frequency (equations S4.1 and S4.2). Simulation assumes mean value of  $d$  over all fishing gears included in the comparative studies ( $d = 0.13$ ).

## References

1. Hughes KM, et al. (2014) Investigating the effects of mobile bottom fishing on benthic biota: a systematic review protocol. *Environmental Evidence* 3:23:DOI: 10.1186/2047-2382-1183-1123
2. Sainsbury JC (1986) *Commercial fishing methods*. Fishing News Books, Oxford
3. Eigaard OR, et al. (2016) The footprint of bottom trawling in European waters: distribution, intensity and seabed integrity. *ICES J Mar Sci* 10.1093/icesjms/fsw194
4. Borenstein M, Hedges LV, Higgins JPT, Rothstein HR (2009) *Introduction to Meta-Analysis*. Wiley, Chichester, UK
5. Eigaard OR, et al. (2015) Estimating seabed pressure from demersal trawls, seines, and dredges based on gear design and dimensions. *ICES J Mar Sci* 73 S1:i27-i43.
6. Hiddink JG, et al. (2006) Cumulative impacts of seabed trawl disturbance on benthic biomass, production and species richness in different habitats. *Can J Fish Aquat Sci* 63:721-736
7. Ellis N, Pantus F, Pitcher CR (2014) Scaling up experimental trawl impact results to fishery management scales—a modelling approach for a “hot time”. *Can J Fish Aquat Sci* 71:733-746
8. Rijnsdorp AD, Buys AM, Storbeck F, Visser EG (1998) Micro-scale distribution of beam trawl effort in the southern North Sea between 1993 and 1996 in relation to the trawling frequency of the sea bed and the impact on benthic organisms. *ICES J Mar Sci* 55:403-419
9. Delignette-Muller ML, Dutang C (2015) *fitdistrplus: An R Package for Fitting Distributions*. *J Stat Softw* 64:1-34
10. Wutzler T (2012) *logitnorm: Functions for the logitnormal distribution*. R package version 0.8.29. <http://CRAN.R-project.org/package=logitnorm>.
11. Lambert GI, et al. (2014) Quantifying recovery rates and resilience of seabed habitats impacted by bottom fishing. *J Appl Ecol* 51:1326–1336
12. Alves F, Chícharo L, Nogueira A, Regala J (2003) Changes in benthic community structure due to clam dredging on the Algarve coast and the importance of seasonal analysis. *J Mar Biol Assoc UK* 83:719-729
13. Brown E, Finney B, Hills S, Dommissie M (2005) Effects of commercial otter trawling on benthic communities in the southeastern Bering Sea. *American Fisheries Society Symposium* 41:439-491
14. Carvalho S, et al. (2011) Relationship between razor clam fishing intensity and potential changes in associated benthic communities. *J Shellfish Res* 30:309-323

15. Constantino R, et al. (2009) Clam dredging effects and subsequent recovery of benthic communities at different depth ranges. *Mar Environ Res* 67:89-99
16. Drabsch SL, Tanner JE, Connell SD (2001) Limited infaunal response to experimental trawling in previously untrawled areas. *ICES J Mar Sci* 58:1261-1271
17. Eleftheriou A, Robertson MR (1992) The effects of experimental scallop dredging on the fauna and physical environment of a shallow sandy community. *Neth J Sea Res* 30:289-299
18. Gilkinson KD, et al. (2005) Immediate impacts and recovery trajectories of macrofaunal communities following hydraulic clam dredging on Banquereau, eastern Canada. *ICES J Mar Sci* 62:925-947
19. Goldberg R, et al. (2012) Effects of hydraulic shellfish dredging on the ecology of a cultivated clam bed. *Aquaculture Environment Interactions* 3:11-21
20. Hall SJ, Harding MJ (1997) Physical disturbance and marine benthic communities: the effects of mechanical harvesting of cockles on non-target benthic infauna. *J Appl Ecol* 34:497-517
21. Hall SJ, Basford DJ, Robertson MR (1990) The Impact of Hydraulic Dredging for Razor Clams *Ensis* Sp. on an Infaunal Community. *Neth J Sea Res* 27:119-125
22. Henry L-A, et al. (2006) Impacts of otter trawling on colonial epifaunal assemblages on a cobble bottom ecosystem on Western Bank (northwest Atlantic). *Mar Ecol Prog Ser* 306:63-78
23. Hinz H, Murray LG, Malcolm FR, Kaiser MJ (2012) The environmental impacts of three different queen scallop (*Aequipecten opercularis*) fishing gears. *Mar Environ Res* 73:85-95
24. Kaiser MJ, Spencer BE (1996) The effects of beam-trawl disturbance on infaunal communities in different habitats. *J Anim Ecol* 65:348-358
25. Kaiser MJ, Edwards DB, Spencer BE (1996) Infaunal community changes as a result of commercial clam cultivation and harvesting. *Aquat Living Resour* 9:57-63
26. Kaiser MJ, et al. (1998) Changes in megafaunal benthic communities in different habitats after trawling disturbance. *ICES J Mar Sci* 55:353-361
27. Peterson CH, Summerson HC, Fegley SR (1987) Ecological consequences of mechanical harvesting of clams. *Fish Bull* 85:281-298
28. Pranovi F, et al. (2000) Rapido trawling in the northern Adriatic Sea: effects on benthic communities in an experimental area. *ICES J Mar Sci* 57:517-524
29. Pranovi F, et al. (2005) Trawl Fishing Disturbance and Medium-Term Microfaunal Recolonization Dynamics: A Functional Approach to the Comparison between Sand and Mud Habitats in the Adriatic Sea (Northern Mediterranean Sea). In: *American Fisheries Society Symposium*, Vol 41. American Fisheries Society, p 545

30. Prantoni AL, et al. (2013) An experimental evaluation of the short-term effects of trawling on infaunal assemblages of the coast off southern Brazil. *J Mar Biol Assoc UK* 93:495-502
31. Prena J, et al. (1999) Experimental otter trawling on a sandy bottom ecosystem of the Grand Banks of Newfoundland: analysis of trawl bycatch and effects on epifauna. *Mar Ecol Prog Ser* 181:107-124
32. Sanchez P, Demestre M, Ramon M, Kaiser MJ (2000) The impact of otter trawling on mud communities in the northwestern Mediterranean. *ICES J Mar Sci* 57:1352-1358
33. Skilleter GA, Zharikov Y, Cameron B, McPhee DP (2005) Effects of harvesting callianassid (ghost) shrimps on subtropical benthic communities. *J Exp Mar Biol Ecol* 320:133-158
34. Sparks-McConkey PJ, Watling L (2001) Effects on the ecological integrity of a soft-bottom habitat from a trawling disturbance. *Hydrobiologia* 456:73-85
35. Spencer BE, Kaiser MJ, Edwards DB (1998) Intertidal clam harvesting: benthic community change and recovery. *Aquac Research* 29:429-437
36. Thrush SF, Hewitt JE, Cummings VJ, Dayton PK (1995) The impact of habitat disturbance by scallop dredging on marine benthic communities: what can be predicted from the results of experiments? *Mar Ecol Prog Ser* 129:141-150
37. Pikitch EK, et al. (2004) Ecosystem-based fishery management. *Science* 305:346-347
38. Tuck ID, et al. (1998) Effects of physical trawling disturbance in a previously unfished sheltered Scottish sea loch. *Mar Ecol Prog Ser* 162:227-242
39. Tuck ID, et al. (2000) The impact of water jet dredging for razor clams, *Ensis* spp., in a shallow sandy subtidal environment. *J Sea Res* 43:65-81
40. Wynberg RP, Branch GM (1994) Disturbance associated with bait-collection for sandprawns (*Callinassa kraussi*) and mudprawns (*Upogebia africana*): long-term effects on the biota of intertidal sandflats. *J Mar Res* 52:523-558
41. Atkinson LJ, Field JG, Hutchings L (2011) Effects of demersal trawling along the west coast of southern Africa: Multivariate analysis of benthic assemblages. *Mar Ecol Prog Ser* 430:241-255
42. Collie JS, Hermsen JM, Valentine PC, Almeida FP (2005) Effects of fishing on gravel habitats: assessment and recovery of benthic megafauna on Georges Bank. In: Barnes P, Thomas J (eds) *Benthic habitats and the effects of fishing*, Vol 41. American Fisheries Society, Bethesda, MD., p 325-343
43. Currie DR, et al. (2011) Relative importance of environmental gradients and historical trawling effort in determining the composition and distribution of benthic macro-biota in a large inverse estuary. *Fish Res* 107:184-195

44. Frid CLJ, Clark RA, Hall JA (1999) Long-term changes in the benthos on a heavily fished ground off the NE coast of England. *Mar Ecol Prog Ser* 188:13-20
45. Hiddink JG, Johnson AF, Kingham R, Hinz H (2011) Could our fisheries be more productive? Indirect negative effects of bottom trawl fisheries on fish condition. *J Appl Ecol* 48:1441–1449
46. Hinz H, Prieto V, Kaiser MJ (2009) Trawl disturbance on benthic communities: chronic effects and experimental predictions. *Ecol Appl* 19:761–773
47. Jennings S, et al. (2001) Trawling disturbance can modify benthic production processes. *J Anim Ecol* 70:459-475
48. Jennings S, Nicholson MD, Dinmore TA, Lancaster J (2002) The effect of chronic trawling disturbance on the production of infaunal communities. *Mar Ecol Prog Ser* 243:251-260
49. Kaiser MJ, et al. (2000) Chronic fishing disturbance has changed shelf sea benthic community structure. *J Anim Ecol* 69:494-503
50. Mangano MC, et al. (2014) Infaunal community responses to a gradient of trawling disturbance and a long-term Fishery Exclusion Zone in the Southern Tyrrhenian Sea. *Cont Shelf Res* 76:25-35
51. Poiner I, et al. (1998) The Environmental Effects of Prawn Trawling in the Far Northern Section of the Great Barrier Reef Marine Park: 199-1996 Final Report to the Great Barrier Reef Marine Park Authority and the Fisheries Research & Development Corporation., CSIRO Division of Marine Research, Cleveland
52. Burrige CY, et al. (2006) A comparison of demersal communities in an area closed to trawling with those in adjacent areas open to trawling: a study in the Great Barrier Reef Marine Park, Australia. *Fish Res* 79:64-74
53. Queirós AM, Hiddink JG, Hinz H, Kaiser MJ (2006) Effects of chronic bottom trawling disturbance on biomass, production and size spectra of invertebrate infauna communities from different habitats. *J Exp Mar Biol Ecol* 335:91-103
54. Reiss H, et al. (2009) Effects of fishing disturbance on benthic communities and secondary production within an intensively fished area. *Mar Ecol Prog Ser* 394:201-213
55. Smith BE, Collie JS, Lengyel NL (2013) Effects of chronic bottom fishing on the benthic epifauna and diets of demersal fishes on northern Georges Bank. *Mar Ecol Prog Ser* 472:199-217
56. Svane I, Hammett Z, Lauer P (2009) Impacts of trawling on benthic macro-fauna and -flora of the Spencer Gulf prawn fishing grounds. *Estuar Coast Shelf Sci* 82:621-631

57. Tillin HM, Hiddink JG, Kaiser MJ, Jennings S (2006) Chronic bottom trawling alters the functional composition of benthic invertebrate communities on a sea basin scale. *Mar Ecol Prog Ser* 318:31-45
58. Veale LO, Hill AS, Hawkins SJ, Brand AR (2000) Effects of long-term physical disturbance by commercial scallop fishing on subtidal epifaunal assemblages and habitats. *Mar Biol* 137:325-337
59. Vergnon R, Blanchard F (2006) Evaluation of trawling disturbance on macrobenthic invertebrate communities in the Bay of Biscay, France: Abundance Biomass Comparison (ABC method). *Aquat Living Resour* 19:219-228
60. Sydow J (1990) Cruise report experiments on the interaction fishing gear (beamtrawl)-benthos with RV Mitra. *BEON Rapport* 8:1-57
61. Paschen M, Richter U, Köpnick W (2000) TRAPESE - Trawl Penetration in the Seabed. Final Report EU Contract 96-006., University of Rostock
62. Lindeboom HJ, De Groot SJ (1998) IMPACT-II: The effects of different types of fisheries on the North Sea and Irish Sea benthic ecosystems. NIOZ- Report 1998-1/RIVO-DLO Report C003/98. Den Burg, Texel, Netherlands, Netherlands Institute for Sea Research. 404 pp.
63. Bridger J (1972) Some observations on the penetration into the sea bed of tickler chains on a beam trawl. *ICES CM* 7:6
64. Bridger JP, Margetts AR (1971) The effect of a beam trawl on the sea bed. Gear and behaviour committee. *ICES C.M.* 1971/B:8. Report No. Gear and behaviour committee C.M. 1971/B:8
65. Bergman MJN, Hup M (1992) Direct effects of beamtrawling on macrofauna in a sandy sediment in the southern North Sea. *ICES J Mar Sci* 49:5-11
66. Smith C, Rumohr H, Karakassis I, Papadopoulou K-N (2003) Analysing the impact of bottom trawls on sedimentary seabeds with sediment profile imagery. *J Exp Mar Biol Ecol* 285:479-496
67. Schwinghamer P, Guigne J, Siu W (1996) Quantifying the impact of trawling on benthic habitat structure using high resolution acoustics and chaos theory. *Can J Fish Aquat Sci* 53:288-296
68. Freese L, Auster PJ, Heifetz J, Wing BL (1999) Effects of trawling on seafloor habitat and associated invertebrate taxa in the Gulf of Alaska. *Mar Ecol Prog Ser* 182:119-126
69. DEGREE (2010) Development of fishing Gears with Reduced Effects on the Environment (DEGREE). Final Publishable Activity Report-EU Contract SSP8-CT-2004-022576
70. Mengual B, et al. (2016) Influence of bottom trawling on sediment resuspension in the 'Grande-Vasière' area (Bay of Biscay, France). *Ocean Dyn* 66:1181-1207
71. Lucchetti A, Sala A (2012) Impact and performance of Mediterranean fishing gear by side-scan sonar technology. *Can J Fish Aquat Sci* 69:1806-1816

72. Krost P, Bernhard M, Werner F, Hukriede W (1989) Otter trawl tracks in Kiel Bay (Western Baltic) mapped by side-scan sonar. *Meeresforschung* 32:344-353
73. Ivanovic A, Neilson RD, O'Neill FG (2011) Modelling the physical impact of trawl components on the seabed and comparison with sea trials. *Ocean Eng* 38:925–933
74. Humborstad O-B, Nøttestad L, Løkkeborg S, Rapp HT (2004) RoxAnn bottom classification system, sidescan sonar and video-sledge: spatial resolution and their use in assessing trawling impacts. *ICES J Mar Sci* 61:53-63
75. Brylinsky M, Gibson J, Gordon Jr DC (1994) Impacts of flounder trawls on the intertidal habitat and community of the Minas Basin, Bay of Fundy. *Can J Fish Aquat Sci* 51:650-661
76. O'Neill FG, Summerbell K, Breen M (2009) An underwater laser stripe seabed profiler to measure the physical impact of towed gear components on the seabed. *Fish Res* 99:234-238
77. Werner F, et al. (1990) Sedimentological effects of trawl fishery in Kiel Bay(western Baltic). *Meyniana Kiel* 42:123-151
78. Pranovi F, Giovanardi O (1994) The impact of hydraulic dredging for short-necked clams, *Tapes* spp., on an infaunal community in the lagoon of Venice. *Sci Mar* 58:345-353
79. van den Heiligenberg T (1987) Effects of mechanical and manual harvesting of lugworms *Arenicola marina* L. on the benthic fauna of tidal flats in the Dutch Wadden Sea. *Biol Conserv* 39:165-177
80. Clarke S, Tully O (2014) BACI monitoring of effects of hydraulic dredging for cockles on intertidal benthic habitats of Dundalk Bay, Ireland. *J Mar Biol Assoc UK* 94:1451-1464
81. Hall-Spencer JM, Moore PG (2000) Scallop dredging has profound, long-term impacts on maerl habitats. *ICES J Mar Sci* 57:1407-1415
82. Lart W, et al. (2003) Evaluation and improvement of shellfish dredge design and fishing effort in relation to technical conservation measures and environmental impact:[ECODREDGE CT98-4465].
83. Buhl-Mortensen L, et al. (2013) Impacts of fisheries and aquaculture on sediments and benthic fauna: suggestions for new management approaches. *Fisken og Havet* 2:69
84. Caddy JF (1973) Underwater observations on tracks of dredges and trawls and some effects of dredging on a scallop ground. *J Fish Res Board Can* 30:173-180
85. Dale A, Boulcott P, Sherwin T (2011) Sedimentation patterns caused by scallop dredging in a physically dynamic environment. *Mar Pollut Bull* 62:2433-2441
86. de Clerk R, Hovart P (1972) On the effects of tickler chains. *ICES C.M.1972/B:15*, 11 pp.
87. De Groot SJ (1984) The impact of bottom trawling on benthic fauna of the North Sea. *Ocean Management* 9:177-190

88. Depestele J, et al. (2016) Measuring and assessing the physical impact of beam trawling. *ICES J Mar Sci* 73:i15-i26
89. de Madron XD, et al. (2005) Trawling-induced resuspension and dispersal of muddy sediments and dissolved elements in the Gulf of Lion (NW Mediterranean). *Cont Shelf Res* 25:2387-2409
90. Gilkinson K, Paulin M, Hurley S, Schwinghamer P (1998) Impact of trawl door scouring on infaunal bivalves: results of a physical trawl door model/dense interaction. *J Exp Mar Biol Ecol* 224:291-312
91. Houghton R, Williams T, Blacker R (1971) Some effects of double beam trawling. *ICES C.M.* 1971/B: 5. Gear and Behaviour Committee
92. Laban C, Lindeboom H (1991) Penetration depth of beam trawl gear. *BEON Rapport* 13:37-52
93. Løkkeborg S (2005) Impacts of trawling and scallop dredging on benthic habitats and communities. *Food & Agriculture Org., Rome*
94. *Journal of Sea Research Fisheries Research* Malik MA, Mayer LA (2007) Investigation of seabed fishing impacts on benthic structure using multi-beam sonar, sidescan sonar, and video. *ICES J Mar Sci* 64:1053-1065
95. O'Neill FG, Summerbell K, Breen M (2008) The Suspension Of Sediment By Scallop Dredges. Fisheries Research Services Internal Report. Report No. No 08/08., FRS Marine Laboratory, Aberdeen, Scotland
96. O'Neill F, et al. (2013) The mobilisation of sediment and benthic infauna by scallop dredges. *Mar Environ Res* 90:104-112
